# Supplementary material
Source: PubMed Central journal article supplement (PMC6774823)
Supplement: NIHMS1530405-supplement-1.pdf [file NIHMS1530405-supplement-1.pdf]

# Supplementary Figure S1

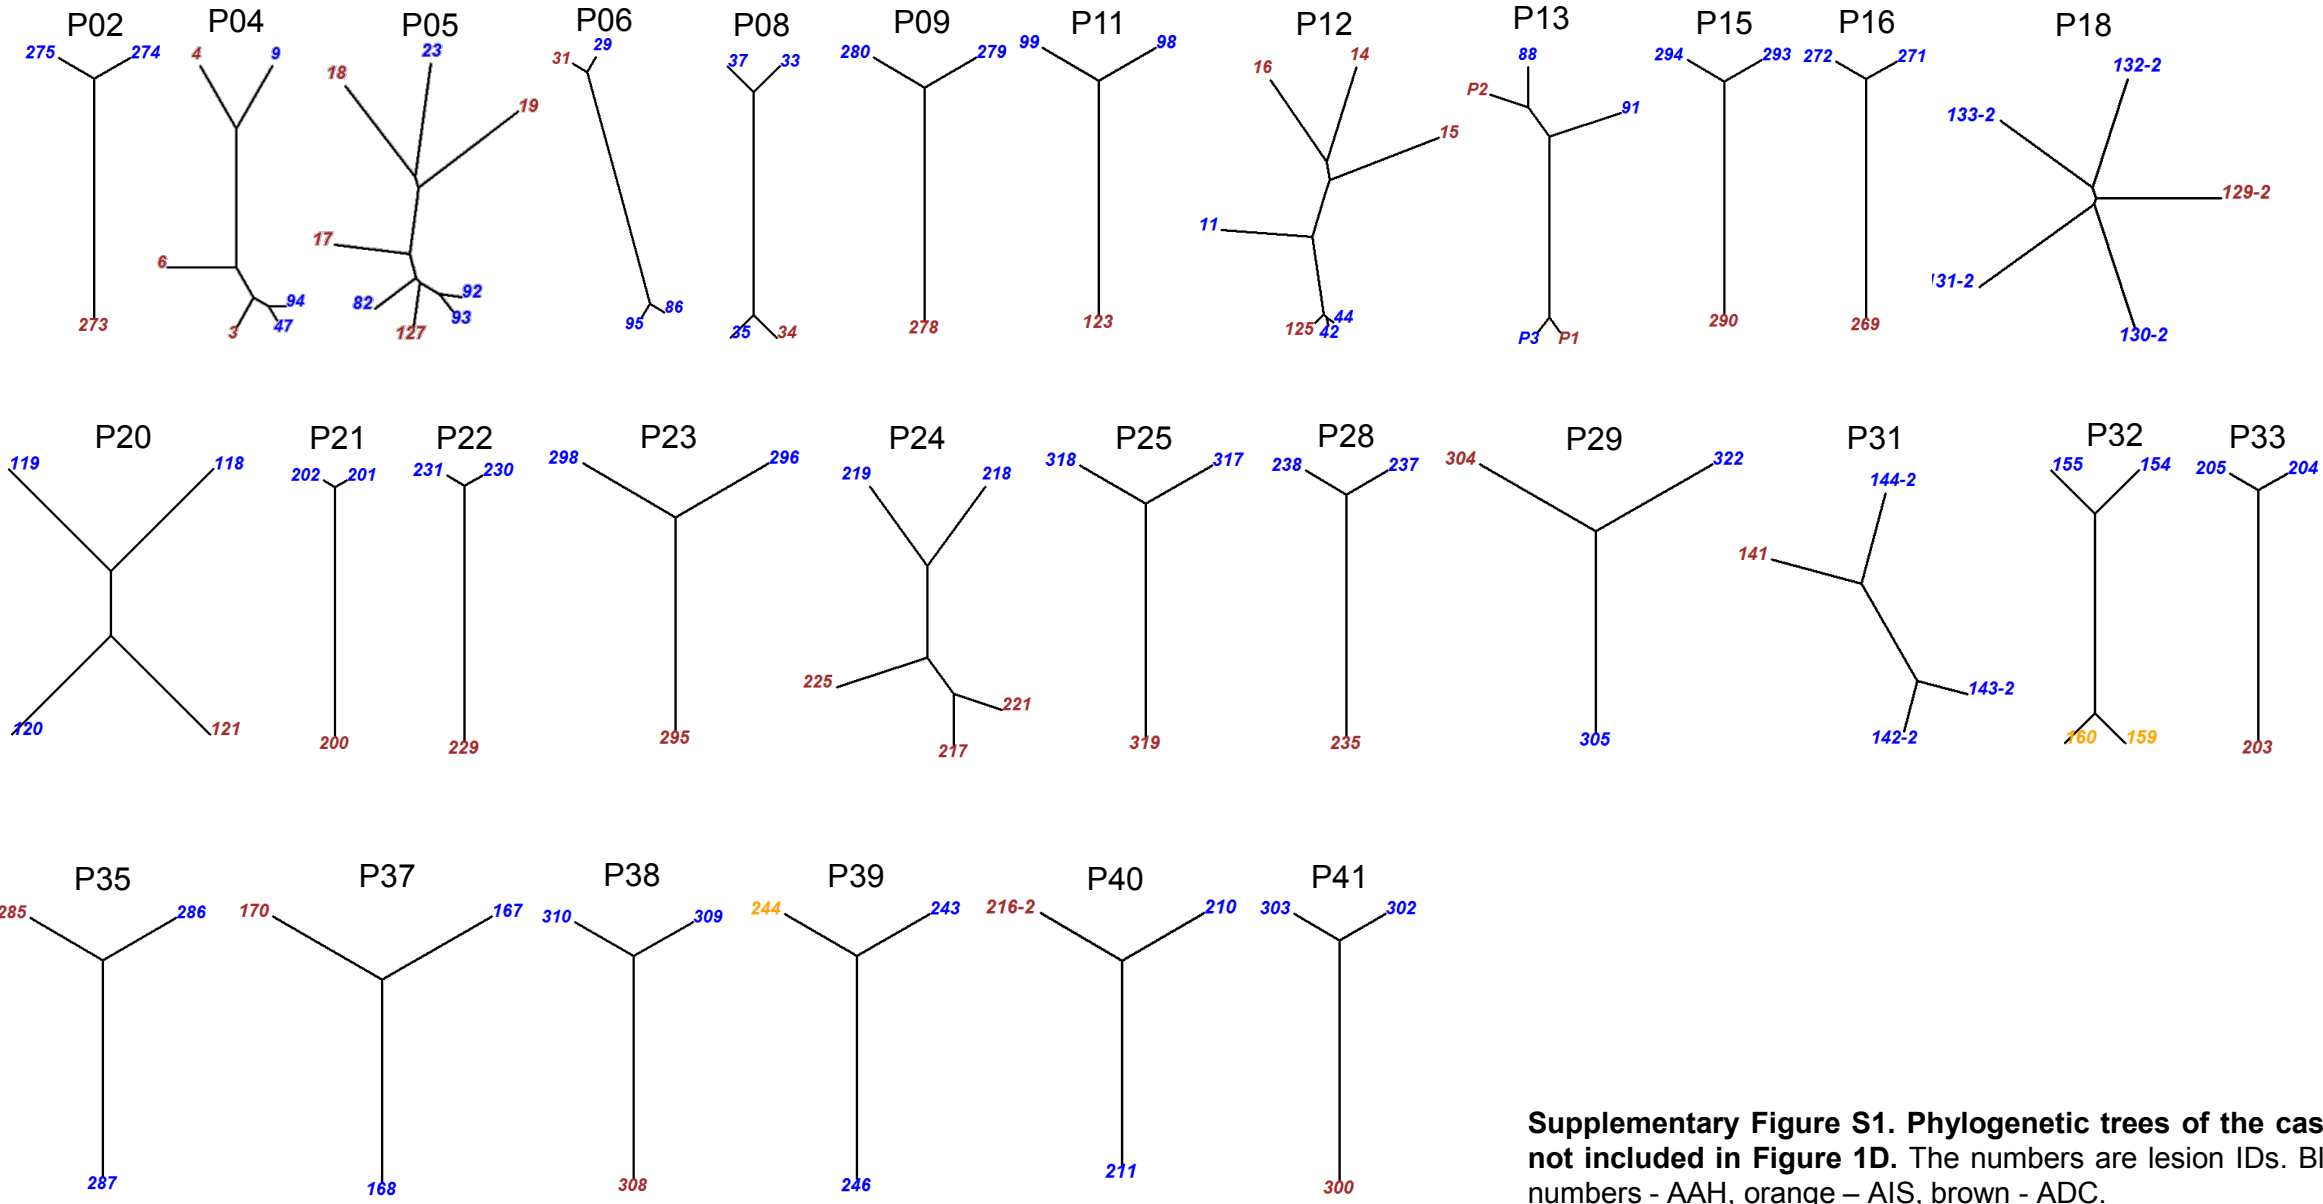

**Supplementary Figure S1. Phylogenetic trees of the cases not included in Figure 1D.** The numbers are lesion IDs. Blue numbers - AAH, orange – AIS, brown - ADC.
