# Supplementary material
Source: PubMed Central journal article supplement (PMC6774823)
Supplement: NIHMS1530405-supplement-3.pdf [file NIHMS1530405-supplement-3.pdf]

## Supplementary Figure S3

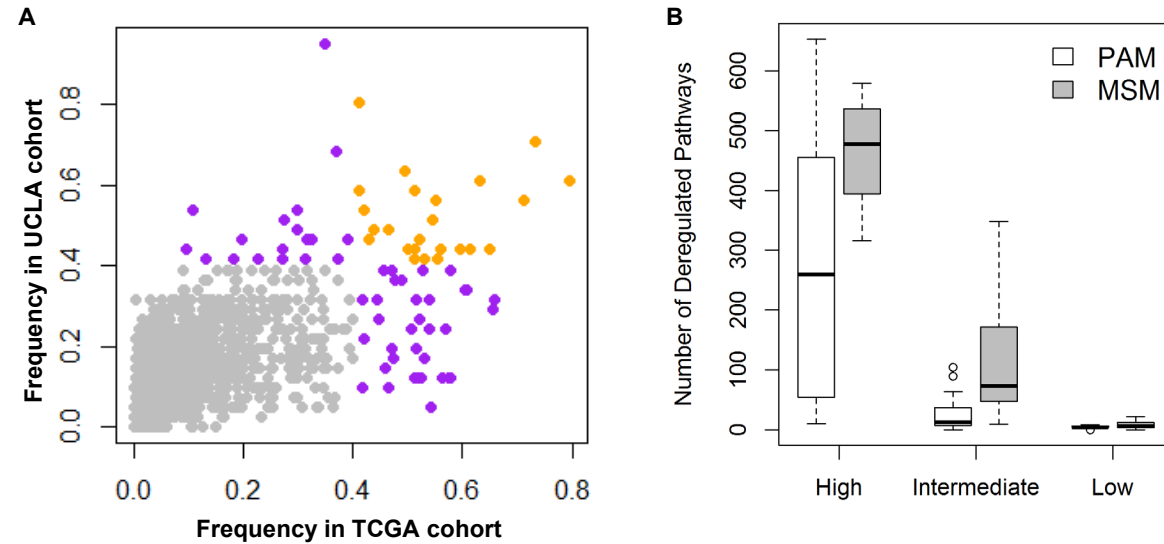

### Supplementary Figure S3. Pathways, frequently deregulated by the mutated genes in TCGA LUAD and UCLA cohorts.

**A)** Recurrence rate of 1341 pathways affected by genes mutated in ADC for TCGA and UCLA cohort. Each data point represents a pathway. Pathways, frequently affected in either or both cohorts are indicated in purple or orange color, respectively. **B)** Distributions of the number of pathways deregulated by PAM- (white bars) and MSM- (grey bars) bearing genes in three patient groups identified in **Figure 2D**.
