# Supplementary material
Source: PubMed Central journal article supplement (PMC6774823)
Supplement: NIHMS1530405-supplement-4.pdf [file NIHMS1530405-supplement-4.pdf]

## Supplementary Figure S4

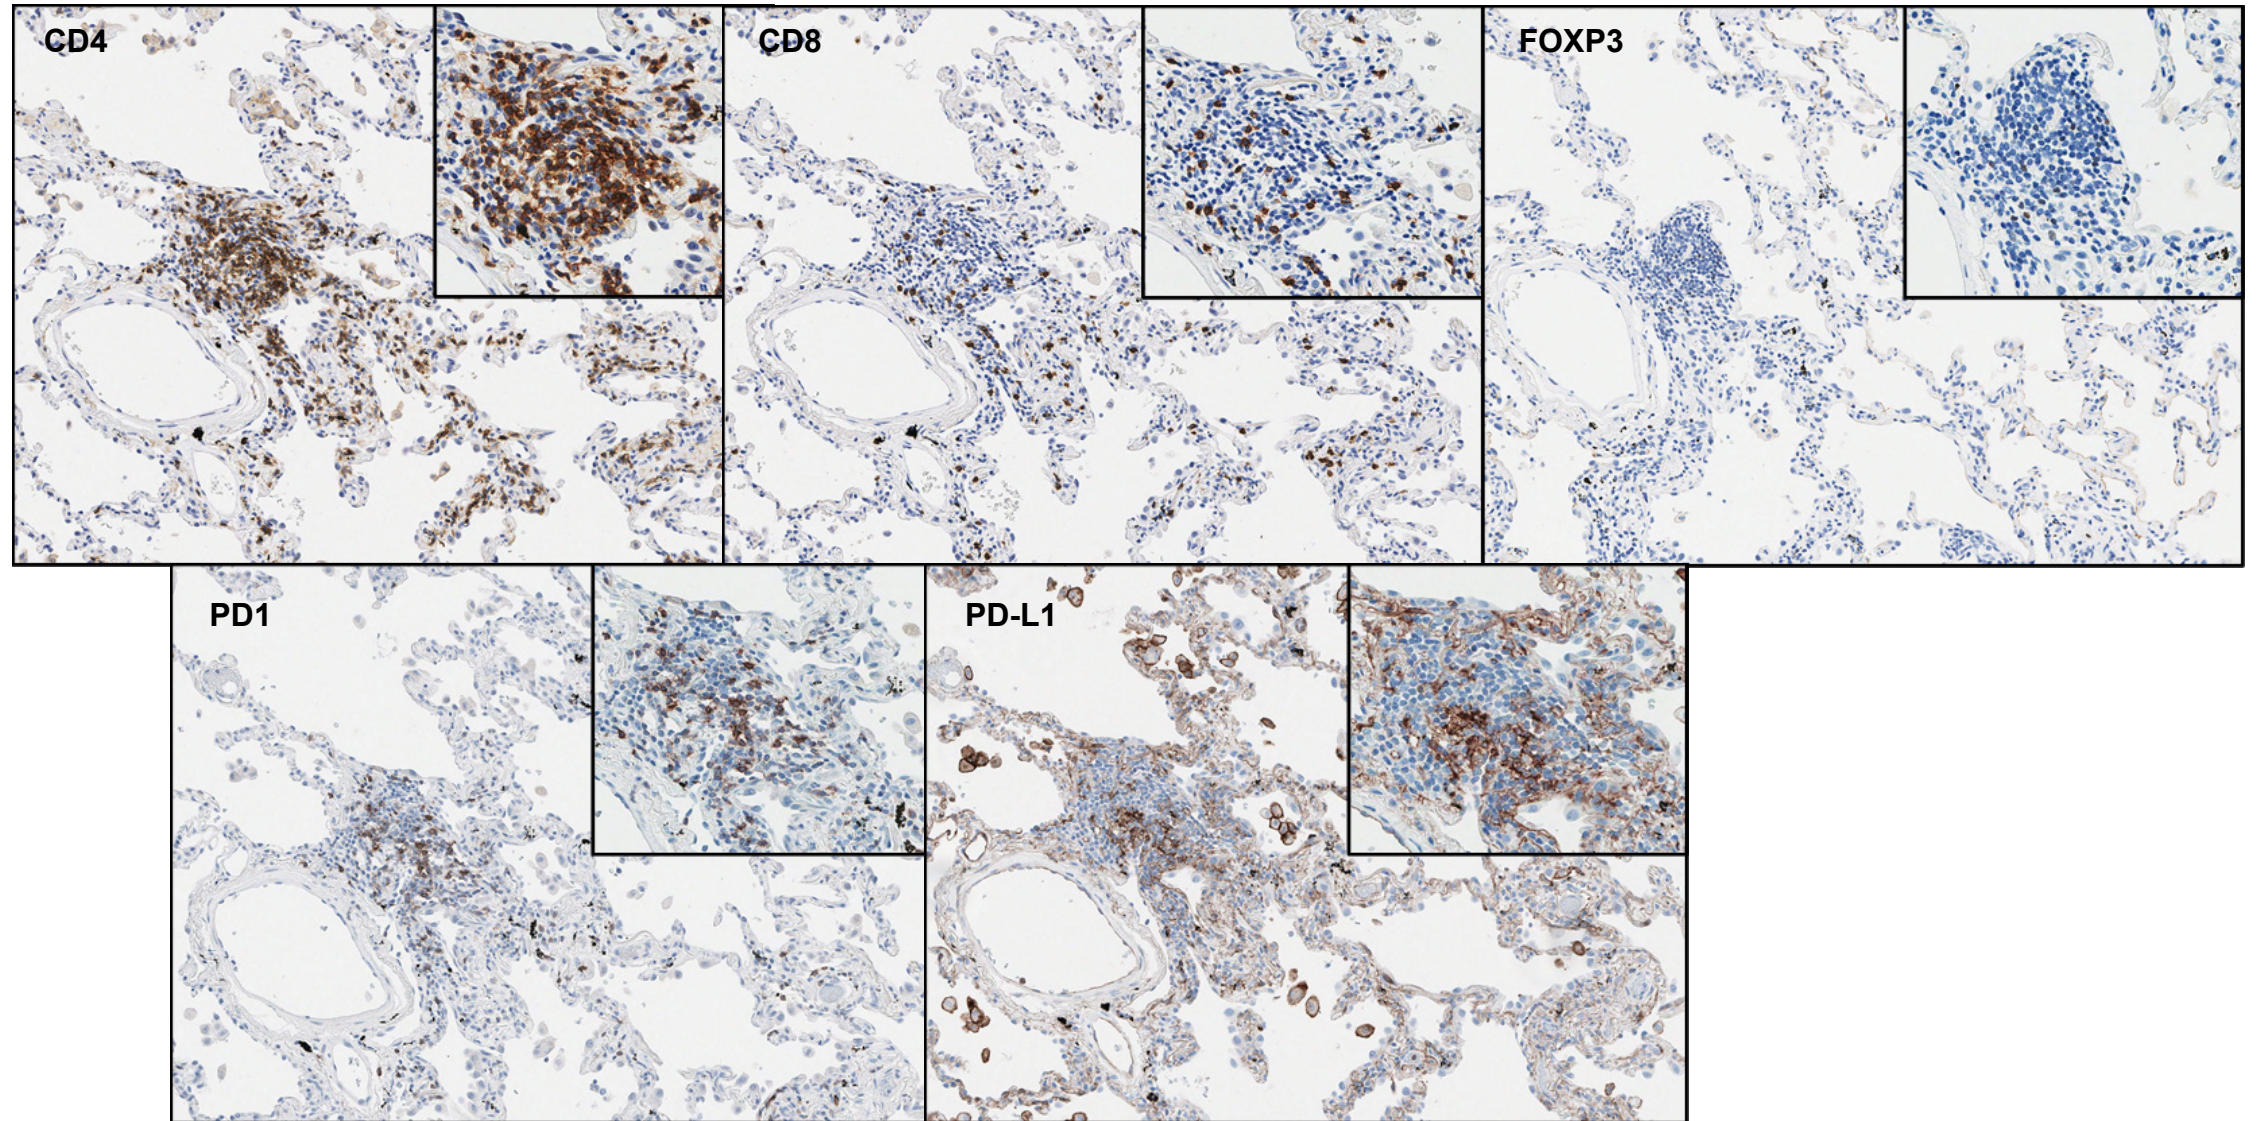

Supplementary Figure S4. A representative IHC staining of lymphocytic markers in an AAH lesion with local lymphocyte infiltration score = 2.
