# Supplementary material
Source: PubMed Central journal article supplement (PMC6774823)

Supplementary Figure S2

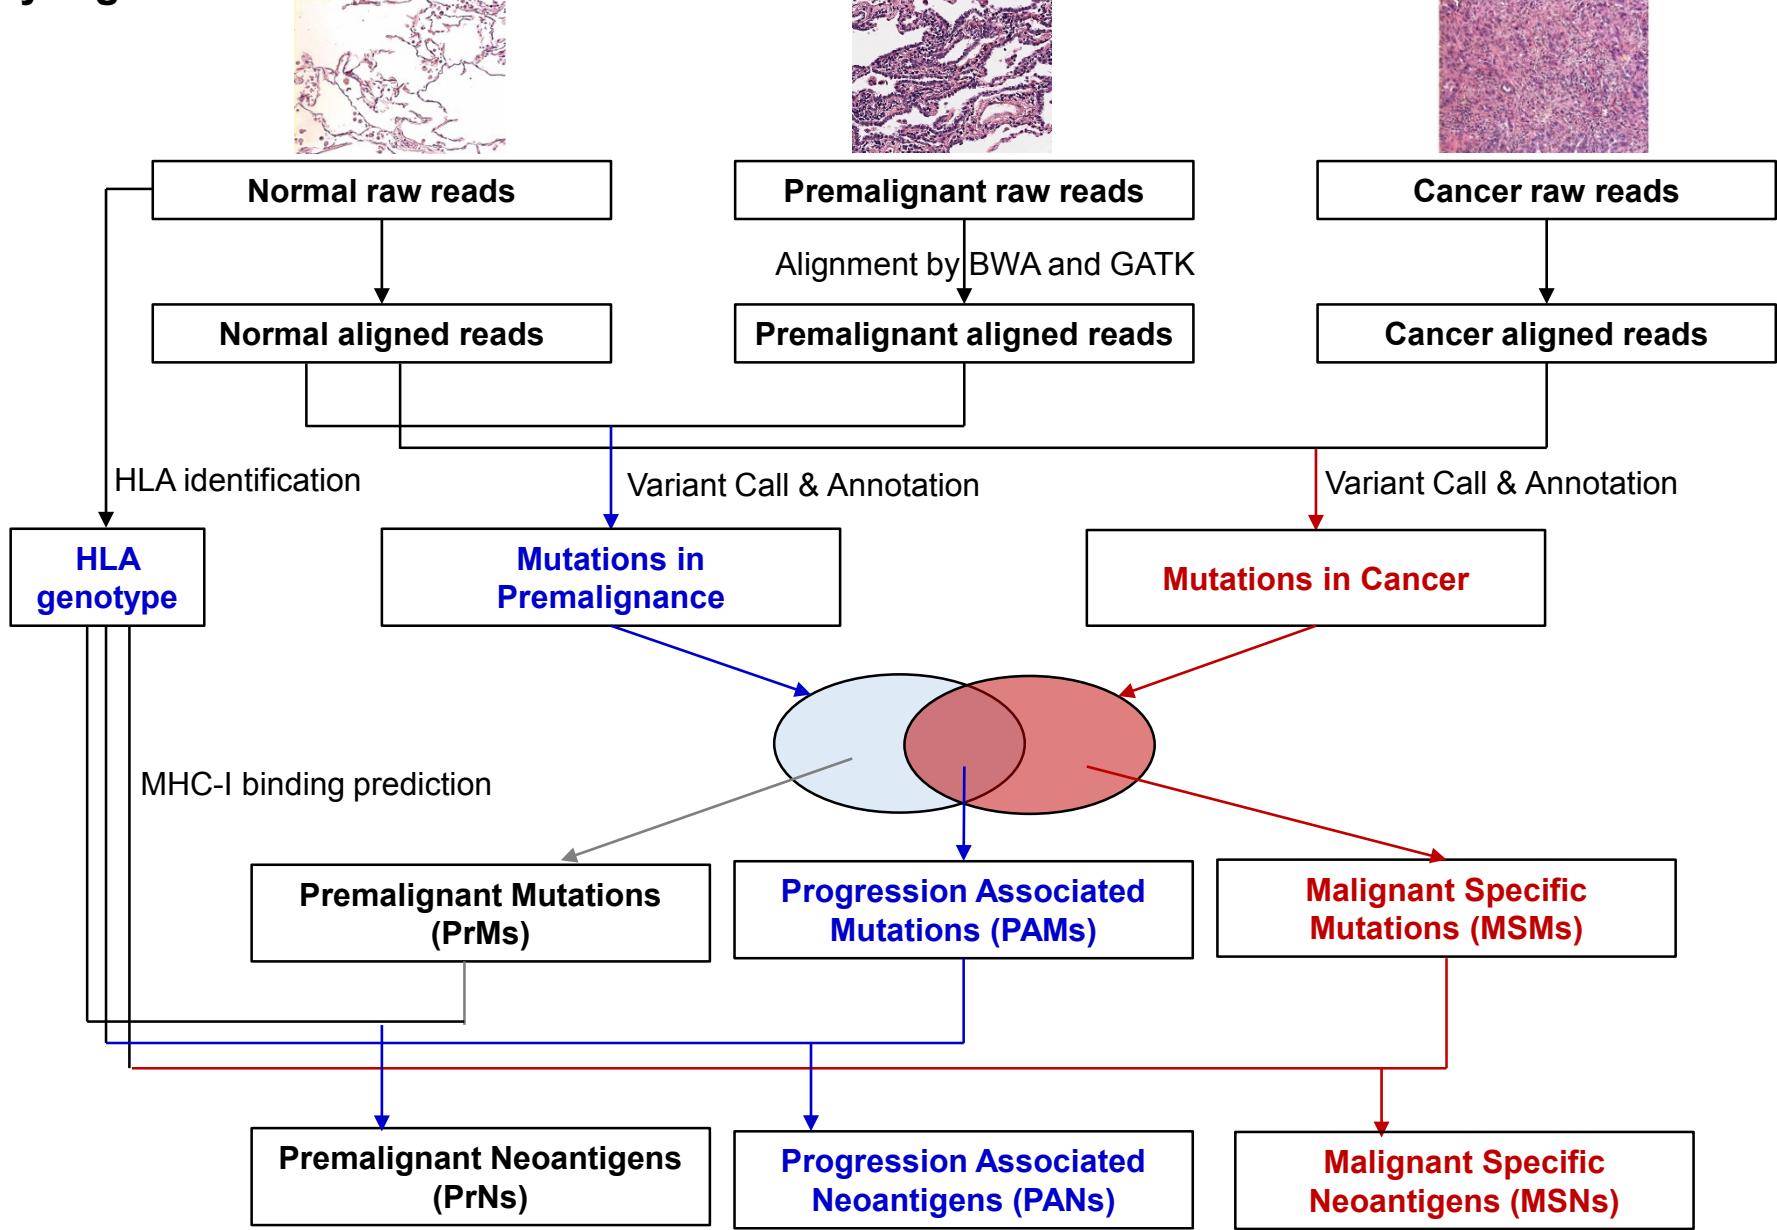

Supplementary Figure S2. Outline of the computational approach.

Supplement: NIHMS1530405-supplement-2.pdf [file NIHMS1530405-supplement-2.pdf]
